# Supplementary material for: Neighborhood Socioeconomic Status and Primary Health Care: Usual Points of Access and Temporal Trends in a Major US Urban Area
Source: Springer Nature journal article supplement (doi:10.1007/s11524-016-0085-2), 2016-10-07
Supplement: MOESM1 [file 10831842]

**ONLINE APPENDIX**

**APPENDIX A: Model Specification and Estimation**

Following formalizations of the multilevel multinomial logit model in the literature,[1](#_ENREF_1),[2](#_ENREF_2) the mixed-effects linear predictor of the probability of having usual source of care (USC) *m*, *η(m)*, for individual *i* in neighborhood *j* was modeled as:

(Eqn. 1)

Where, *β00* is the grand intercept, *Income0j* is neighborhood income, and *Z0j* is a set of neighborhood- and PCSA- level covariates. *Tijt* is a set of *t-1* dummy variables for survey years (*t*=2004, 2006, …, 2012; referent is 2002), each with a parameter *β0jt*. *Xij* is a set of individual-level covariates, and ***μ0j*** is the neighborhood random intercept assumed to be *i.i.d.* ~N(0,τ2), and constrained to be the same across response equations to simplify model estimation. *εij* is the individual-level error term, which follows a logistic distribution with a variance equal to π2/3=3.29 [1](#_ENREF_1),[2](#_ENREF_2). The parameter of primary interest here is ***γ00***, which is the association of neighborhood income with the probability of having a particular USC.

The mean probability of having USC *m*, conditional on all covariates and the neighborhood random effect, is related to the linear predictor, *η(m)*, via the logistic transformation:

(Eqn. 2)

Where response category “0=No USC” was set to be referent, with its linear predictor, *η(0)*, set to zero (its probability can still be estimated readily by rearranging Eqn. 2). Probabilities for all response categories sum to unity.

Respondents were asked whether there is “one person or place you usually go to when you are sick or want advice about your health,” followed by a question to identify that source of care: “where do you usually go - to a private doctor’s office, a community health center or public clinic, a hospital outpatient clinic, a hospital emergency room, or some other place?”[3](#_ENREF_3) While we were interested only in the four categories: No USC (including those who reported hospital ED as USC); physician office; community health center; and outpatient clinic, all multinomial models were estimated with the “Other” USC category included as a possible response level (<2% of the sample). Although this category is rather heterogeneous and perhaps less informative to analyze, including it as a possible response category yielded consistent parameter estimates and relaxed the assumption of independence from irrelevant alternatives (IIA) underlying multinomial model estimation.[1](#_ENREF_1),[4](#_ENREF_4) We do not however report the parameter estimates associated with this response category.

The survey has oversampled the elderly, as well as certain ethnic groups (e.g. Asians) variably by year. The PHMC provides balancing/sampling weights that adjust for oversampling and sample selection bias. While weighted and unweighted two-level models produced similar estimates of neighborhood association with access measures, the variance of random effects was questionably substantially higher in weighted models (ICC~ 20% in weighted vs ~1% unweighted models). Estimation of weighted models was also much more computationally intensive than unweighted estimation. Given that our primary goal was to estimate associations (rather than to derive population estimates of prevalences), and that the sampling criteria of age and ethnicity were already controlled in the models, which yielded consistent (and in fact more precise) parameter estimates,[5](#_ENREF_5) we chose not to use weights in the analyses. Comparisons between weighted and unweighted estimates from reduced-form models are available upon request.

**APPENDIX B: Spatial Variation in Neighborhood Income, Healthcare Supply, and Type of Usual Source of Care (USC)**

Maps in **Figure 1** and **Figure 2** spatially contrast neighborhood variation in median household income and PCSA-level supply of PCPs and CHCs (**Figure 1**), against the variation in USC types (**Figure 2**). Philadelphia by far had the largest concentration of low-income neighborhoods (dark shaded tracts in **Figure 1**), especially in the North Central, Western, and Lower Northeastern areas of the city. Neighborhood income in suburban counties was much higher on average and also more homogeneously distributed than in Philadelphia, notwithstanding a few scattered clusters of poverty. Variation in PCP supply (circles in **Figure 1**) did not strictly follow the variation in neighborhood income in the city, and was more homogeneous in the suburbs.

CHC presence (cross marks in **Figure 1**), on the other hand, was more aligned with neighborhood income than PCP supply. Nonetheless, some predominantly low-income PCSAs, such as those along the Northeastern corridor of the city, had rather low levels of both CHC and PCP supply. In the suburbs, CHC supply was much lower than in the city, with only a few loci of CHC concentration (e.g. West Central Chester County).

The maps in **Figure 2** show neighborhood variation in the age- and gender-adjusted prevalence of having a physician’s office or a CHC as the USC. While residents of most neighborhoods in Philadelphia were moderately likely (50-84%) to identify physician offices as their USC, residents of affluent neighborhoods in the city and the suburbs relied most heavily on them. On the other hand, the reliance on CHCs was much greater in the city than in the suburbs.

All maps were generated using ArchGISDesktop 10 (ESRI, 2013).

**
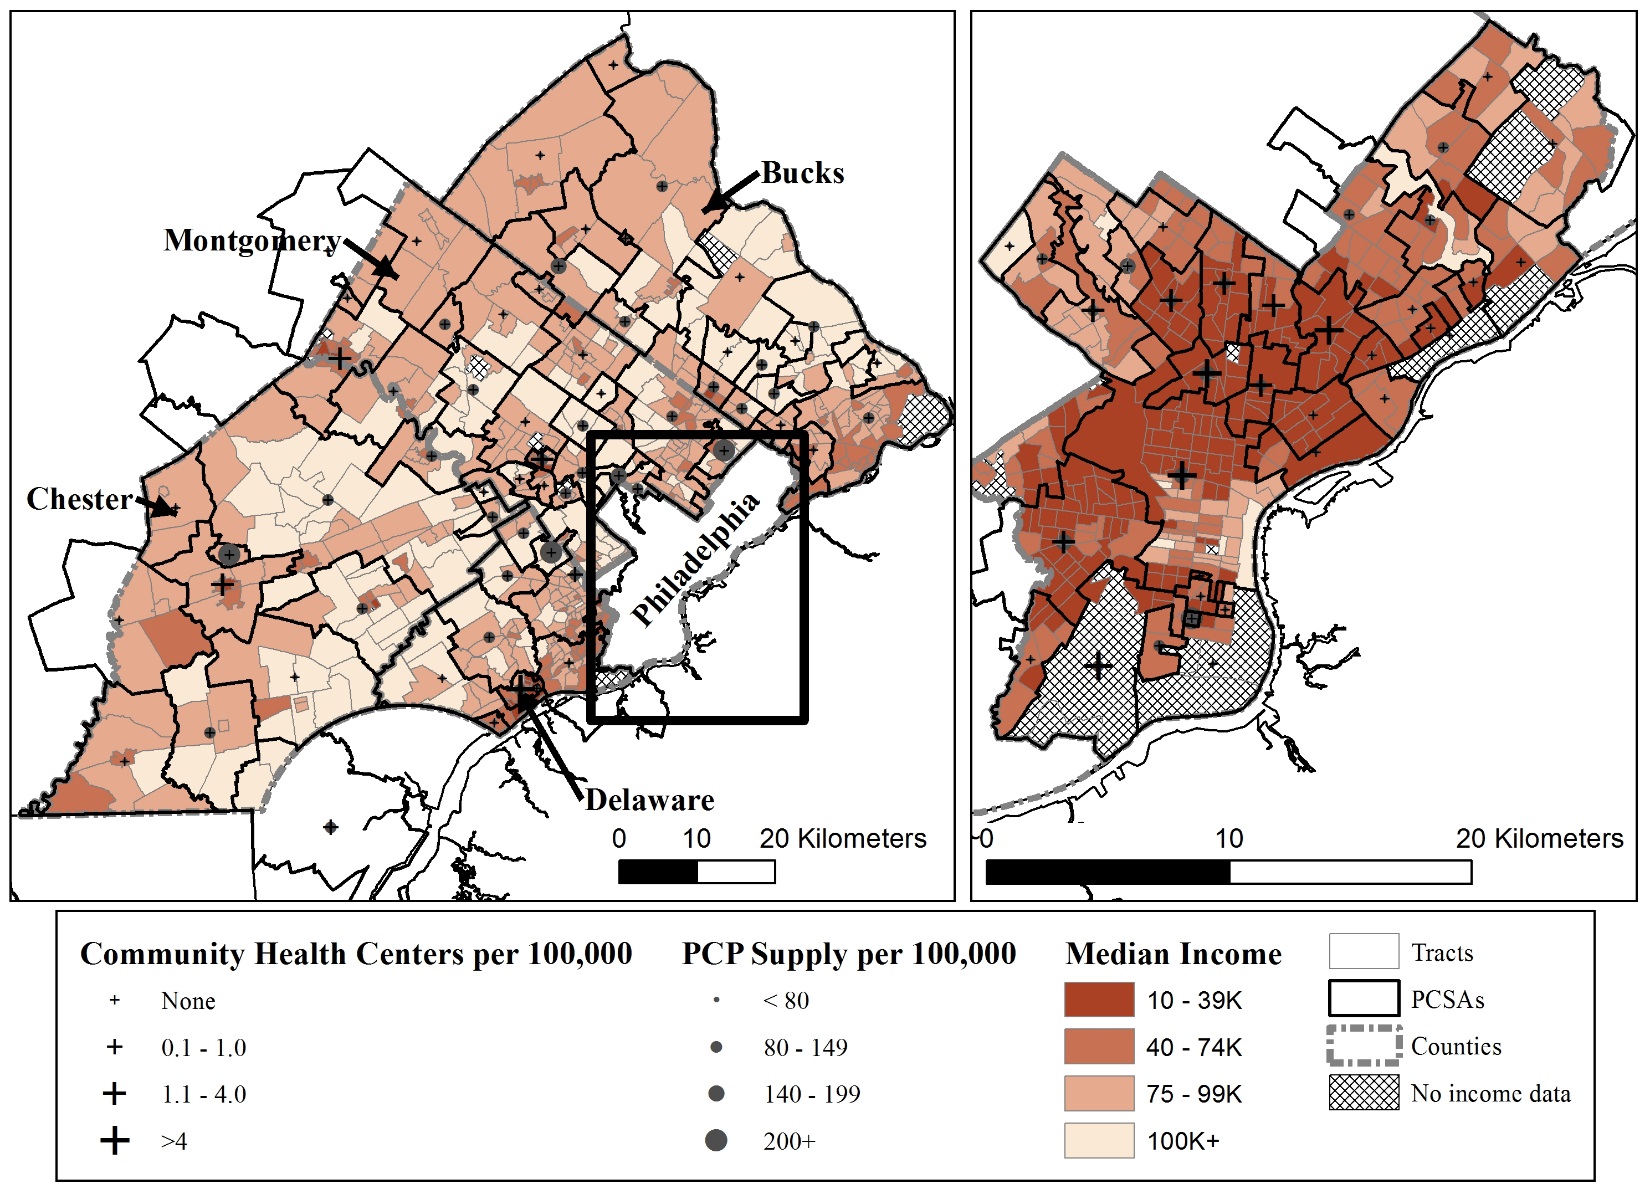
**

**FIGURE B1. Variation in median income across neighborhoods and supply of primary care physicians and community health centers across PCSAs in Greater Philadelphia in 2012.**

PCP: primary care physicians; PCSAs: primary care service areas. Map on right is of Philadelphia County. Map on left is of suburban Pennsylvania counties neighboring Philadelphia.

*Source*: Author analysis of the Southeastern Pennsylvania Household Health Survey, 2012 (n=8,731). Tract income estimates are from the American Community Survey 2007-2011 averages. Supply estimates are from the PCSA Project.

**
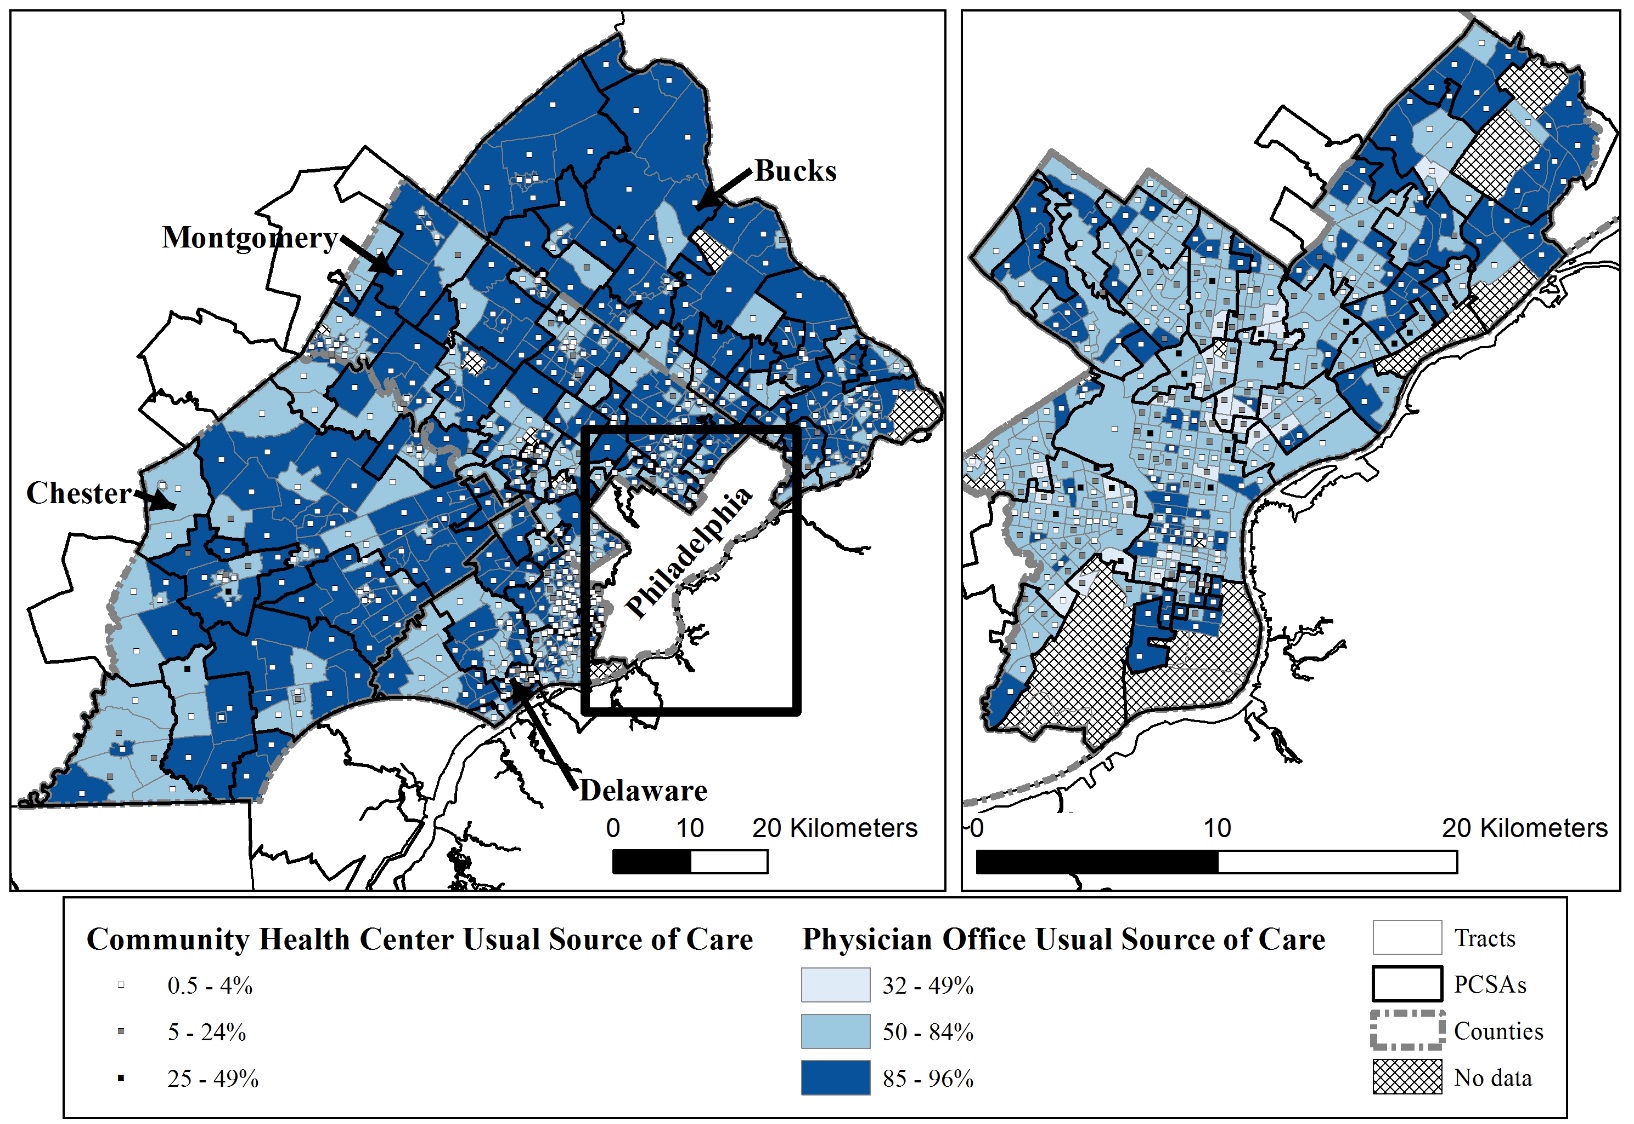
**

**FIGURE B2. Variation in the identified usual source of care across neighborhoods in Greater Philadelphia in 2012.**

PCSAs: primary care service areas. Map on right is of Philadelphia County. Map on left is of suburban Pennsylvania counties neighboring Philadelphia. Plotted estimates are age- and gender-adjusted empirical Bayes means (for each Census tract) of the probability of reporting a physician’s office or a community health center as the usual source of care.

*Source*: Author analysis of the Southeastern Pennsylvania Household Health Survey, 2012 (n=8,731).

**APPENDIX C: Additional Tables**

| **TABLE C1** Adjusted association of neighborhood income with the type of usual source of care (USC), in *Prevalence Rate Ratios (PRRs)* | | | | |
| --- | --- | --- | --- | --- |
|  | **Model 1** | **Model 2** | **Model 3** | **Model 4** |
|  | *Prevalence Rate Ratio [95% Confidence Interval]* | | | |
| **No USC** |  |  |  |  |
| Low-Income, (Q1: <$37K) | 1.454 | 0.996 | 0.972 | 0.964 |
|  | [1.367,1.541]‡ | [0.889,1.102] | [0.866,1.078] | [0.862,1.067] |
| Middle-Income, (Q2: $37-$55K) | 1.302 | 0.973 | 0.986 | 0.950 |
|  | [1.221,1.383]‡ | [0.894,1.051] | [0.906,1.066] | [0.874,1.025] |
| High-Income, (Q3-5: ≥$55K) | Ref | Ref | Ref | Ref |
|  |  |  |  |  |
| **USC: Physician's Office** |  |  |  |  |
| Low-Income, (Q1: <$37K) | 0.703 | 0.946 | 0.957 | 0.963‡ |
|  | [0.692,0.714]‡ | [0.929,0.963]‡ | [0.940,0.974]‡ | [0.946,0.979] |
| Middle-Income, (Q2: $37-$55K) | 0.885 | 0.988 | 0.985 | 0.994 |
|  | [0.875,0.894]‡ | [0.975,1.000]* | [0.972,0.998]† | [0.981,1.006] |
| High-Income, (Q3-5: ≥$55K) | Ref | Ref | Ref | Ref |
|  |  |  |  |  |
| **USC: Community Health Center** | |  |  |  |
| Low-Income, (Q1: <$37K) | 9.244 | 1.572 | 1.487 | 1.413 |
|  | [8.336,10.152]‡ | [1.332,1.811]‡ | [1.256,1.718]‡ | [1.199,1.627]‡ |
| Middle-Income, (Q2: $37-$55K) | 3.484 | 1.137 | 1.131 | 1.071 |
|  | [3.076,3.892]‡ | [0.981,1.293]* | [0.975,1.286] | [0.927,1.215] |
| High-Income, (Q3-5: ≥$55K) | Ref | Ref | Ref | Ref |
|  |  |  |  |  |
| **USC: Hospital Outpatient Dept.** | |  |  |  |
| Low-Income, (Q1: <$37K) | 6.281 | 1.544 | 1.437 | 1.379 |
|  | [5.632,6.929]‡ | [1.271,1.818]‡ | [1.173,1.701]‡ | [1.127,1.630]‡ |
| Middle-Income, (Q2: $37-$55K) | 2.830 | 1.124 | 1.141 | 1.116 |
|  | [2.481,3.179]‡ | [0.947,1.301] | [0.960,1.321] | [0.941,1.292] |
| High-Income, (Q3-5: ≥$55K) | Ref | Ref | Ref | Ref |
| * p<0.10, † p<0.05, ‡ p<0.01. Q: Quintile.  Model 1: adjusted for survey year;  Model 2: Model 1 + individual and neighborhood confounders;  Model 3: Model 2 + healthcare supply;  Model 4: Model 3 + behaviors, insurance, and health status.  See Appendix A for details on model estimation and coefficients for each covariate in Model 4.  *Source*: Author Analysis of the Southeastern Pennsylvania Household Health Survey, 2002-2012 | | | | |

| **TABLE C2.** Parameter estimates, in probability difference terms, from the fully specified multinomial logit model, Model 4. | | | | | |
| --- | --- | --- | --- | --- | --- |
|  | | **No Usual Source of Care** | **Physician's Office** | **Community Health Center** | **Hospital Outpatient Dept.** |
|  | | *Prevalence Rate Difference, Percentage Points [95% CI]* | | | |
| **Neighborhood Income** | |  |  |  |  |
| Low-Income, (Q1: <$37K) | | -0.374 | -3.029‡ | 1.606‡ | 1.180‡ |
|  | | [-1.460,0.713] | [-4.403,-1.656] | [0.934,2.277] | [0.525,1.835] |
| Middle-Income, (Q2: $37-$55K) | | -0.525 | -0.512 | 0.277 | 0.363 |
|  | | [-1.334,0.283] | [-1.530,0.506] | [-0.260,0.813] | [-0.148,0.873] |
| High-Income, (Q3-5: ≥$55K) | | Ref | Ref | Ref | Ref |
| **Survey Year** | |  |  |  |  |
| 2002 | | Ref | Ref | Ref | Ref |
| 2004 | | -0.039 | 0.807 | -1.888‡ | 1.368‡ |
|  | | [-0.845,0.767] | [-0.234,1.847] | [-2.490,-1.286] | [0.867,1.869] |
| 2006 | | -0.601 | 2.550‡ | -2.479‡ | 0.885‡ |
|  | | [-1.448,0.246] | [1.480,3.621] | [-3.084,-1.873] | [0.389,1.381] |
| 2008 | | 0.201 | -0.428 | -0.816† | 1.336‡ |
|  | | [-0.671,1.074] | [-1.530,0.674] | [-1.478,-0.155] | [0.816,1.856] |
| 2010 | | -0.289 | -0.310 | -0.923‡ | 1.714‡ |
|  | | [-1.152,0.574] | [-1.416,0.795] | [-1.587,-0.258] | [1.182,2.246] |
| 2012 | | 0.087 | -0.635 | -0.927‡ | 1.544‡ |
|  | | [-0.809,0.983] | [-1.786,0.517] | [-1.624,-0.230] | [0.975,2.114] |
| **Sociodemographics** | |  |  |  |  |
| *Age Group* | |  |  |  |  |
| 18-24 | | Ref | Ref | Ref | Ref |
| 25-44 | | -2.253‡ | 5.409‡ | -1.601‡ | -0.728* |
|  | | [-3.478,-1.028] | [3.827,6.992] | [-2.376,-0.825] | [-1.506,0.050] |
| 45-64 | | -5.614‡ | 9.494‡ | -1.774‡ | -1.109‡ |
|  | | [-6.855,-4.372] | [7.896,11.091] | [-2.583,-0.965] | [-1.902,-0.316] |
| 65-79 | | -6.917‡ | 12.027‡ | -2.507‡ | -1.679‡ |
|  | | [-8.359,-5.474] | [10.193,13.860] | [-3.447,-1.567] | [-2.560,-0.797] |
| 80+ | | -5.840‡ | 9.035‡ | -2.406‡ | -1.143† |
|  | | [-7.541,-4.139] | [6.853,11.217] | [-3.537,-1.275] | [-2.215,-0.071] |
| *Female* | | -4.744‡ | 6.327‡ | 0.599‡ | -0.827‡ |
|  | | [-5.292,-4.196] | [5.642,7.012] | [0.237,0.960] | [-1.181,-0.474] |
| *Race/Ethnicity* | |  |  |  |  |
| White | | Ref | Ref | Ref | Ref |
| Black, Non-Hispanic | | 0.368 | -9.319‡ | 4.624‡ | 3.811‡ |
|  | | [-0.495,1.230] | [-10.469,-8.169] | [4.044,5.203] | [3.211,4.412] |
| Hispanic | | 1.777‡ | -8.766‡ | 4.431‡ | 2.342‡ |
|  | | [0.488,3.066] | [-10.473,-7.059] | [3.558,5.305] | [1.514,3.171] |
| Asian | | 3.021‡ | -6.955‡ | 2.742‡ | 1.299† |
|  | | [1.479,4.564] | [-9.007,-4.902] | [1.642,3.841] | [0.296,2.302] |
| Other | | 2.275† | -8.790‡ | 3.051‡ | 3.063‡ |
|  | | [0.448,4.101] | [-11.074,-6.506] | [1.910,4.192] | [1.931,4.194] |
| *Married/Cohabiting* | | -2.157‡ | 2.912‡ | 0.015 | -0.461‡ |
|  | | [-2.714,-1.599] | [2.207,3.616] | [-0.361,0.391] | [-0.806,-0.115] |
| *County of Residence* | |  |  |  |  |
| Suburban | | Ref | Ref | Ref | Ref |
| Urban: Philadelphia | | 0.197 | -3.350‡ | 1.951‡ | 1.231‡ |
|  | | [-0.527,0.920] | [-4.256,-2.444] | [1.489,2.412] | [0.791,1.671] |
| *Home Language Not English* | | 1.137‡ | -2.425‡ | 1.140‡ | -0.035 |
|  | | [0.278,1.996] | [-3.527,-1.323] | [0.546,1.733] | [-0.573,0.504] |
| *Total Family Income, Quartiles* | |  |  |  |  |
| Unknown (Missing) | | 0.936† | -3.328‡ | 1.883‡ | 0.421 |
|  | | [0.040,1.833] | [-4.489,-2.166] | [1.221,2.546] | [-0.210,1.052] |
| Low, (Q1: <$30K) | | 2.378‡ | -7.090‡ | 3.390‡ | 1.076‡ |
|  | | [1.319,3.437] | [-8.435,-5.745] | [2.683,4.098] | [0.393,1.759] |
| Lower Middle, (Q2: $30-$55K) | | 0.105 | -2.718‡ | 1.513‡ | 0.925‡ |
|  | | [-0.752,0.961] | [-3.843,-1.594] | [0.874,2.153] | [0.302,1.548] |
| Upper Middle, (Q3: $56-$96K) | | -0.964† | 0.199 | 0.271 | 0.454 |
|  | | [-1.756,-0.172] | [-0.870,1.268] | [-0.378,0.919] | [-0.166,1.073] |
| High (Q4: ≥$99K) | | Ref | Ref | Ref | Ref |
| *Educational Attainment* | |  |  |  |  |
| Below High School | | 1.566† | -0.874 | 1.233‡ | -0.807† |
|  | | [0.332,2.800] | [-2.403,0.656] | [0.353,2.113] | [-1.572,-0.043] |
| High School | | -0.352 | 1.584‡ | 0.140 | -0.650* |
|  | | [-1.205,0.501] | [0.450,2.718] | [-0.598,0.878] | [-1.310,0.010] |
| Some College | | -1.182‡ | 3.067‡ | -0.638* | -0.598* |
|  | | [-2.046,-0.318] | [1.910,4.223] | [-1.387,0.111] | [-1.274,0.079] |
| College Graduate | | -0.332 | 2.690‡ | -1.107‡ | -0.703† |
|  | | [-1.154,0.491] | [1.567,3.814] | [-1.867,-0.347] | [-1.387,-0.019] |
| Postgraduate/Professional | | Ref | Ref | Ref | Ref |
| *Employment Status* | |  |  |  |  |
| Unemployed | | -0.595 | 0.260 | 0.142 | -0.113 |
|  | | [-1.505,0.315] | [-0.963,1.484] | [-0.416,0.700] | [-0.684,0.458] |
| Student, Retired, or Disabled | | -1.504‡ | 0.196 | 0.414* | 0.240 |
|  | | [-2.193,-0.815] | [-0.685,1.077] | [-0.075,0.902] | [-0.213,0.693] |
| Employed | | Ref | Ref | Ref | Ref |
| **Neighborhood Confounders** | |  |  |  |  |
| Percent Black (SD, ~ 32%) | | -0.133 | 0.027 | -0.149 | 0.152 |
|  | | [-0.569,0.303] | [-0.515,0.569] | [-0.417,0.120] | [-0.115,0.418] |
| Percent Hispanic (SD ~ 11%) | | -0.073 | 0.281 | -0.039 | -0.041 |
|  | | [-0.363,0.216] | [-0.089,0.650] | [-0.190,0.112] | [-0.202,0.121] |
| Percent Foreign Born (SD ~ 7%) | | 0.099 | -0.269 | -0.076 | 0.175† |
|  | | [-0.156,0.354] | [-0.594,0.057] | [-0.247,0.094] | [0.011,0.340] |
| Percent Elderly (>65 years) (SD ~ 7%) | | -0.002 | 0.496‡ | -0.323‡ | -0.217† |
|  | [-0.276,0.273] | [0.138,0.853] | [-0.548,-0.099] | [-0.421,-0.012] |
| **Local PCSA Healthcare Supply** (per 100,000 population) | | | |  |  |
| All Clinically Active PCPs (SD ~55) | | 0.215 | -0.140 | -0.335* | 0.215 |
|  | [-0.180,0.610] | [-0.669,0.389] | [-0.676,0.006] | [-0.083,0.512] |
| Clinically Active IMG PCPs (SD ~ 10) | | 0.314* | -0.439* | 0.160 | 0.049 |
|  | [-0.026,0.654] | [-0.896,0.018] | [-0.114,0.433] | [-0.195,0.293] |
| Community Health Centers (SD ~ 2) | | 0.558‡ | -1.291‡ | 0.364‡ | 0.302‡ |
|  | [0.256,0.860] | [-1.673,-0.910] | [0.173,0.556] | [0.133,0.471] |
| Hospital Emergency Dept. (SD ~ 1.0) | | -0.007 | -0.290 | 0.254† | 0.055 |
|  | [-0.278,0.264] | [-0.651,0.070] | [0.039,0.470] | [-0.164,0.275] |
| Hospital Outpatient Dept. (SD ~ 0.5) | | -0.093 | 0.023 | -0.069 | 0.013 |
|  | [-0.375,0.188] | [-0.330,0.377] | [-0.249,0.111] | [-0.145,0.170] |
| **Behaviors, Insurance, and Health** | | |  |  |  |
| *Behaviors* | |  |  |  |  |
| Obese | | -1.586‡ | 1.708‡ | 0.184 | -0.022 |
|  | | [-2.154,-1.017] | [0.998,2.417] | [-0.194,0.562] | [-0.368,0.325] |
| Currently Smoking | | 0.390 | -1.190‡ | 0.343* | 0.337* |
|  | | [-0.216,0.997] | [-1.967,-0.413] | [-0.057,0.743] | [-0.044,0.717] |
| Exercise ≥ 3 times/week | | 0.086 | -0.920‡ | 0.350† | 0.213 |
|  | | [-0.405,0.576] | [-1.540,-0.299] | [0.011,0.688] | [-0.099,0.525] |
| *Insurance Status* | |  |  |  |  |
| Employer-Sponsored | | -1.361‡ | 3.693‡ | -0.950‡ | -0.743‡ |
|  | | [-2.145,-0.577] | [2.745,4.641] | [-1.445,-0.454] | [-1.179,-0.306] |
| Medicare | | 0.450 | -0.448 | -0.437* | 0.501† |
|  | | [-0.377,1.277] | [-1.430,0.534] | [-0.913,0.039] | [0.057,0.946] |
| Medicaid | | 0.330 | -2.579‡ | 1.703‡ | 0.630‡ |
|  | | [-0.595,1.254] | [-3.660,-1.497] | [1.138,2.268] | [0.162,1.097] |
| Individually Purchased | | -0.299 | 1.531‡ | -0.433† | -0.342* |
|  | | [-0.899,0.302] | [0.802,2.261] | [-0.856,-0.010] | [-0.702,0.018] |
| Other Insurance | | 0.026 | -1.715‡ | 0.479† | 0.441† |
|  | | [-0.575,0.627] | [-2.447,-0.984] | [0.041,0.916] | [0.077,0.806] |
| Uninsured | | 18.826‡ | -25.111‡ | 5.960‡ | -0.550* |
|  | | [16.691,20.961] | [-27.282,-22.940] | [4.828,7.093] | [-1.185,0.085] |
| *Health Status* | |  |  |  |  |
| Fair/Poor Health, Self-Rated | | 1.600‡ | -3.372‡ | 0.271 | 1.389‡ |
|  | | [0.852,2.349] | [-4.275,-2.468] | [-0.145,0.688] | [0.949,1.830] |
| Had ≥3 ED Visits Last Year | | 2.040‡ | -1.732† | -1.331‡ | 0.970‡ |
|  | | [0.736,3.343] | [-3.218,-0.246] | [-1.858,-0.804] | [0.320,1.620] |
| Asthma | | -1.013‡ | 1.243‡ | 0.397* | -0.304 |
|  | | [-1.717,-0.309] | [0.364,2.122] | [-0.067,0.861] | [-0.704,0.096] |
| Diabetes | | -2.111‡ | 0.890* | 0.583† | 0.400 |
|  | | [-2.951,-1.272] | [-0.127,1.907] | [0.050,1.115] | [-0.079,0.879] |
| High Blood Pressure | | -4.213‡ | 4.232‡ | 0.390* | -0.159 |
|  | | [-4.759,-3.667] | [3.521,4.942] | [-0.015,0.794] | [-0.533,0.214] |
| Mental Illness | | -2.865‡ | 1.767‡ | -0.117 | 0.504† |
|  | | [-3.502,-2.229] | [0.905,2.630] | [-0.572,0.338] | [0.049,0.959] |
| *Sample Size* | | 55,528 | | | |
| *Random Intercept LR Test P Val.* | | 0.054 | | | |
| *Level-2 Contribution* | | Variance = 0.039; ICC = 1.172% | | | |
| * p<0.10, † p<0.05, ‡ p<0.01. CI: Confidence Interval; Q: Quintile; SD: Standard Deviation; PCSA: Primary Care Service Area; PCP: Primary Care Physician; IMG: International Medical Graduate; ED: Emergency Department; LR: Likelihood Ratio; ICC: Intra-class Correlation Coefficient. | | | | | |
|  | | | | |

**REFERENCES**

**1.** Skrondal A, Rabe-Hesketh S. Multilevel logistic regression for polytomous data and rankings. Psychometrika. 2003;68(2):267-287.

**2.** Grilli L, Rampichini C. A multilevel multinomial logit model for the analysis of graduates’ skills. Stat. Meth. & Appl. 2007;16(3):381-393.

**3.** PHMC. Community health database. Southeastern pennsylvania household health survey. Philadelphia, PA:Public Health Management Corporation, 2012.

**4.** Hausman J, McFadden D. Specification tests for the multinomial logit model. Econometrica. 1984;52(5):1219-1240.

**5.** Solon G, Haider SJ, Wooldridge J. What are we weighting for? NBER Working Paper. 2013;18859.
